# Supplementary material for: Casein kinase 1 dynamics underlie substrate selectivity and the PER2 circadian phosphoswitch
Source: eLife. 2020 Feb 11;9:e52343. doi: 10.7554/eLife.52343 (PMC7012598; doi:10.7554/eLife.52343)
Supplement: Supplementary file 1. — (A) X-ray crystallography data collection and refinement statistics. (B) Enzymatic efficiency of CK1δ ΔC (wild-type and mutants). (C) Survey of anion binding and activation loop conformation in CK1 family member structures. (D) Details of simulated systems. [file elife-52343-supp1.xlsx]

## Sheet: Supplementary File 1a
X-ray crystallography data collection and refinement statistics
		CK1δ ΔC	CK1δ ΔC	CK1δ ΔC
		tau R178C	No Sulfate	K171E
	PDB	6PXN	6PXO	6PXP
	Data collection
	Space group	P21	P21	P21
	Resolution	64.82-1.55	65.24-2.00 (2.11-2.00)	47.38 – 2.35
		(1.58-1.55)		(2.43-2.35)
	a, b, c	50.08, 129.64, 51.86	49.91, 130.49, 51.16	50.06, 130.35, 51.65
	a, b, g	90, 113.41, 90	90, 112.75, 90	90, 113.47, 90
	Rmerge	6.3 (60.1)	10.5 (104.2)	12.8 (65.2)
	Rpim	2.8 (27.0)	4.5 (46.8)	7.7 (40.4)
	Total reflections	588739 (27527)	252539 (34017)	109702 (10773)
	Unique reflections	85497 (4108)	40494 (5884)	25271 (2470)
	I/s	13.1 (2.5)	11.2 (1.7)	6.7 (2.1)
	CC1/2	0.99(0.89)	0.99 (0.61)	0.99 (0.77)
	Completeness	97.8(95.3)	99.6 (99.7)	99.9 (99.9)
	Redundancy	6.9 (6.7)	6.2 (5.8)	4.3 (4.4)
	Wilson B-Factor	19	28	32
	Refinement
	Resolution	44.68-1.55	47.18-2.0	42.5-2.35
	Rwork/Rfree	17.9/20.6	17.9/23.7	20.0/24.3
	No. of Atoms	5057	5012	4922
	Protein	4735	4727	4757
	Water	297	285	115
	Ligands	25	-	50
	RMS deviation
	Bond lengths	0.01	0.008	0.009
	Bond angles	1.2	0.94	1.15
	Ramachandran Favored/Outliers	100.0/0.0	100.0/0.0	100/0.0
	Average B-Factor	34	41	41
	Values in parentheses are for highest resolution shell

## Sheet: Supplementary File 1b
Enzymatic efficiency of CK1δ ΔC (WT and mutants)
	CK1δ ΔC	FASP	Degron	FASP/Degron
		kcat/Km (M-1 s-1)	kcat/Km (M-1 s-1)	Efficiency Ratio
	wild-type	0.0576 ± 0.0012	0.0322 ± 0.0009	1.77 ± 0.09
	T44A	0.0447 ± 0.0007	0.0332 ± 0.0017	1.37 ± 0.08
	H46R	0.0237 ± 0.0005	0.0235 ± 0.0009	1.01 ± 0.08
	P47S	0.0349 ± 0.0008	0.0312 ± 0.0020	1.14 ± 0.09
	R127E	0.0464 ± 0.0016	0.0479 ± 0.0011	0.969 ± 0.05
	K154E	0.0381 ± 0.0008	0.0350 ± 0.0021	1.09 ± 0.05
	K171E	0.0425 ± 0.0008	0.0363 ± 0.0005	1.17 ± 0.03
	L173A	0.0358 ± 0.0037	0.0276 ± 0.0012	1.30 ± 0.06
	tau (R178C)	0.0350 ± 0.0013	0.0368 ± 0.0008	0.918 ± 0.02
	tau L173A	0.0203 ± 0.0007	0.0198 ± 0.0002	1.02 ± 0.03
	K224D	0.0345 ± 0.0010	0.0319 ± 0.0009	1.08 ± 0.01
	kcat/Km data are represented as mean ± s.d. from n = 3 assays

## Sheet: Supplementary File 1c
Survey of anion binding and activation loop conformation in CK1 family member structures
	PDB code	Species	Isoform	Res. (Å)	Space group	Site 1 Occ.†	Site 2 Occ.†	A-loop switch conformation	Mutation or ligand
	1CKI	Rat	CK1δ	2.3	P 21 21 21	no	no	down
	1CKJ	Rat	CK1δ	2.46	P 21 21 21	yes	yes/no	down/up
	4HGT	Human	CK1δ	1.8	P 1 21 1	no	no	down	ligand
	4HNF	Human	CK1δ	2.07	C 1 2 1	no	no	down	ligand
	3UYS	Human	CK1δ	2.3	P1	yes	yes/no	down
	3UYT	Human	CK1δ	2	P1	yes	yes/no	down/poor density	ligand
	3UZP	Human	CK1δ	1.94	P 1 21 1	no	no	down	ligand
	4TWC	Human	CK1δ	1.7	P 1 21 1	yes	yes	down	ligand
	4JJR	Mouse	CK1δ	2.41	P 1 21 1	yes	yes	down
	4KB8	Human	CK1δ	1.95	P1	yes	yes/no	down/poor density	ligand
	4KBA	Human	CK1δ	1.98	P1	yes	yes/no	down/poor density	ligand
	4KBC	Human	CK1δ	1.98	P1	yes	yes	down	ligand
	4KBK	Human	CK1δ	2.1	P1	yes	yes	down	ligand
	4TW9	Human	CK1δ	2.4	P 1 21 1	yes	yes	down	ligand
	4TN6	Human	CK1δ	2.41	P 1 21 1	yes	yes	down	ligand
	5IH4	Human	CK1δ	1.9	P 31 2 1	yes	yes	down
	5IH5	Human	CK1δ	2.25	P 31 2 1	yes	yes	down	ligand
	5IH6	Human	CK1δ	2.3	P 31 2 1	yes	yes	down	ligand
	5W4W	Human	CK1δ	1.99	P1	yes	yes/no	down	ligand
	5MQV	Human	CK1δ	2.15	C 1 2 1	yes	yes/no	down	ligand
	5X17	Human	CK1δ	2	P 1 21 1	yes	yes	down	ADP
	5OKT	Human	CK1δ	2.13	P 1 21 1	yes	yes	down	ligand
	6GZM	Human	CK1δ	1.59	P 1 21 1	yes	yes	down	ligand
	6F1W	Human	CK1δ	1.86	P 1 21 1	yes	yes	down	ligand
	6F26	Human	CK1δ	1.83	P 1 21 1	yes	yes	down	ligand
	6PXN	Human	CK1δ	1.55	P21	no	yes/no	down/up	R178C
	6PXO	Human	CK1δ	2	P21	no	no	down/up	WT
	6PXP	Human	CK1δ	2.35	P21	yes	yes	down	K171E
	4HOK	Human	CK1ε	2.77	C 1 2 1	yes	no	down
	5X18	S. cerevisiae	CK1	1.8	P 12 1 1	no	no	down
	1CSN	S.pombe	CK1	2	P 32 2 1	yes	yes	down	Mg-ATP
	2CSN	S.pombe	CK1	2.5	P 32 2 1	yes	yes	down	ligand
	1EH4	S.pombe	CK1	2.8	P 61	yes	yes	down	ligand
	4XH0	C.glabrata	Hrr25	1.99	P 21 2 21	yes	yes	down	ADP
	4XHG	C.glabrata	Hrr25	2.15	P 21 2 21	no	no	down	ADP
	4XHH	C.glabrata	Hrr25	2.91	P 21 2 21	yes	yes	down
	4XHL	C.glabrata	Hrr25	3.1	P 21 2 21	yes	yes	down	K38R
	2CMW	Human	CK1ɣ1	1.75	P 21 21 21	yes	no	down
	2C47	Human	CK1ɣ2	2.4	P 21 21 21	no	no	down	ligand
	2CHL*	Human	CK1ɣ3	1.95	P 31 2 1	yes	yes	down	ligand
	3SV0	O. sativa	CK1-like	2	C 1 2 1	no	no	down
	†Reflects anion occupancy (Occ.) at Site 1 or Site 2
	*Other CK1ɣ3 structures with ligands (all activation loop switch down): 2IZR, 2IZS, 2IZT, 2IZU, 4G16, 4HGL, 4HGS

## Sheet: Supplementary File 1d
	Details of simulated systems
	System	Activation loop conformation	Presence of SO42- ions			Chain	PDB
			Site 1	Site 2	Site 3
	WT CK1δloop down	Down	Yes	Yes	Yes	B	1CKJ
	WT CK1δloop up	Up	Yes	No	Yes	A	1CKJ
	tau CK1δloop down	Down	No	Yes	Yes	B	6PXN
	tau CK1δloop up	Up	No	No	Yes	A	6PXN
	WT CK1δloop down-anion	Down	Yes	No*	Yes	B	1CKJ
	tau CK1δloop down-anion	Down	No	No*	Yes	B	6PXN
	The nomenclature of the anion binding sites is defined in Figure S4.
	* SO42- ions were computationally removed
