# Supplementary material for: Casein kinase 1 dynamics underlie substrate selectivity and the PER2 circadian phosphoswitch
Source: eLife. 2020 Feb 11;9:e52343. doi: 10.7554/eLife.52343 (PMC7012598; doi:10.7554/eLife.52343)
Supplement: Supplementary file 2. [file elife-52343-supp2.xlsx]

## Sheet: Supplementary File 2
	CK1 family alleles and their circadian phenotypes
	Organism	Gene	Allele	Residue(s)	Studied in	Circadian Phenotype
	Syrian Hamster	CK1ε	tau	R178C	Syrian Hamster	Short period
						(Ralph and Menaker, 1988)
	Mouse	CK1ε	tau	R178C	Mouse	Short period
						(Lowrey et al., 2000)
	Drosophila	DBT	dbttau	R178C	Drosophila	Short period
						(Fan et al., 2009)
	Human	CK1ε		S408N	n.d.	Protective against DSPS
						(Takano et al., 2004)
	Human	CK1δ		T44A	Mouse	Short period
						(Xu et al., 2005)
		CK1δ		T44A	Drosophila	Long period
						(Xu et al., 2005)
	Human	CK1δ		H46R	In vitro	Low activity
						(Brennan et al., 2013)
	Mouse	CK1δ		K224D	Mouse	Short period
						(Shinohara et al., 2017)
	Drosophila	DBT	dco2	G175S	Drosophila	n.d.
						(Zilian et al., 1999)
	Drosophila	DBT	dco3	R4C, E47K	Drosophila	n.d.
						(Zilian et al., 1999)
	Drosophila	DBT	dco18	S181F	Drosophila	n.d.
						(Zilian et al., 1999)
	Drosophila	DBT	dbtS	P47S	Drosophila	Short period
						(Kloss et al., 1998; Price et al., 1998)
	Drosophila	DBT	dbtL	M80I	Drosophila	Long period
						(Kloss et al., 1998; Price et al., 1998)
	Drosophila	DBT	dbtG	R127H	Drosophila	Long period
						(Suri et al., 2000)
	Drosophila	DBT	dbtH	T44I	Drosophila	Long period
						(Suri et al., 2000)
	Drosophila	DBT	dbtAR	H126Y	Drosophila	Long period
						(Rothenfluh et al., 2000)
	Drosophila	DBT	dbtK/R	K38R	Drosophila	Long period
						(Muskus et al., 2007)
	Drosophila	DBT	dbtP	5’ UTR	Drosophila	Arrhythmic in larva ( PER stabilized); lethal in pupae
						(Kloss et al., 1998; Price et al., 1998)
	Drosophila	DBT	dbtEY02910	5’ UTR	Drosophila	Arrhythmic or long period
						(Zheng et al., 2014)
	Abbreviations: DSPS, Delayed Sleep Phase Disorder; n.d., not determine
